# Supplementary material for: Historical nitrogen fertilizer use in China from 1952 to 2018
Source: Copernicus journal article supplement (doi:10.5194/essd-14-5179-2022), 2022-11-23

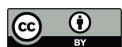

*Supplement of*

## **Historical nitrogen fertilizer use in China from 1952 to 2018**

**Zhen Yu et al.**

*Correspondence to:* Zhen Yu (zyu@nuist.edu.cn)

The copyright of individual parts of the supplement might differ from the article licence.

**Fig. S1** Supplementary information showing the datasets used for reconstruction and spatialization of nitrogen fertilizer use in China.

**Fig. S2** Supplementary information showing nitrogen fertilizer use rate in major crop types from 1952 to 2018 using data of nearby provinces for gap-filling.

**Fig. S3** Supplementary information showing nitrogen fertilizer use rate in major crop types from 1952 to 2018 using data of national averages for gap-filling.

**Fig. S4** Supplementary information showing total nitrogen fertilizer input for each major crop types from 1952 to 2018 using data of nearby provinces for gap-filling.

**Fig. S5** Supplementary information showing total nitrogen fertilizer input for each major crop types from 1952 to 2018 using data of national averages for gap-filling.

**Fig. S1** Supplementary information showing the datasets used for reconstruction and spatialization of nitrogen fertilizer use in China. (Yu's cropland: the cropland data reconstructed in Yu et al., (2021); Liu' data: crop rotation maps from Liu et al., (2018); CAY: Chinese Agricultural Yearbook; FAO: FAO statistical database obtained from <http://faostat.fao.org>; CSY: Chinese Statistical Yearbook).

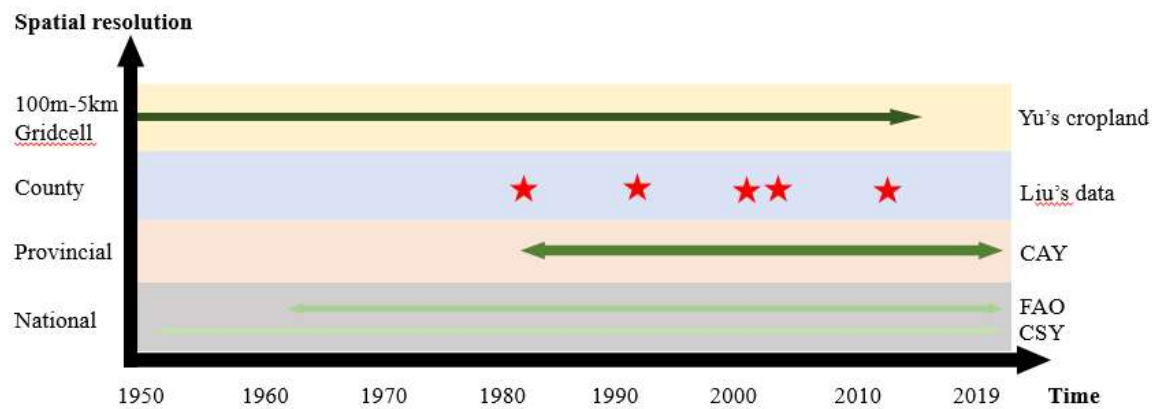

**Fig. S2** Supplementary information showing nitrogen fertilizer use rates in major crop types in China from 1952 to 2018 using data of nearby provinces for gap-filling. (panel a: N fertilizer rate of vegetable is the average of all other crops (except ‘Other crops’), and compound fertilizers contains 16% of N; panel b: N fertilizer use rates of vegetable is the average of all other crops (except ‘Other crops’), and compound fertilizer contains 33% of N; panel c: N fertilizer rate of vegetable is 3.3 times of the average rate of all other crops (except ‘Other crops’), and compound fertilizer contains 16% of N; panel b: N fertilizer rate of vegetable is 3.3 times of the average rate of all other crops (except ‘Other crops’), and compound fertilizer contains 33% of N; Unit:  $\text{g N m}^{-2} \text{yr}^{-1}$ )

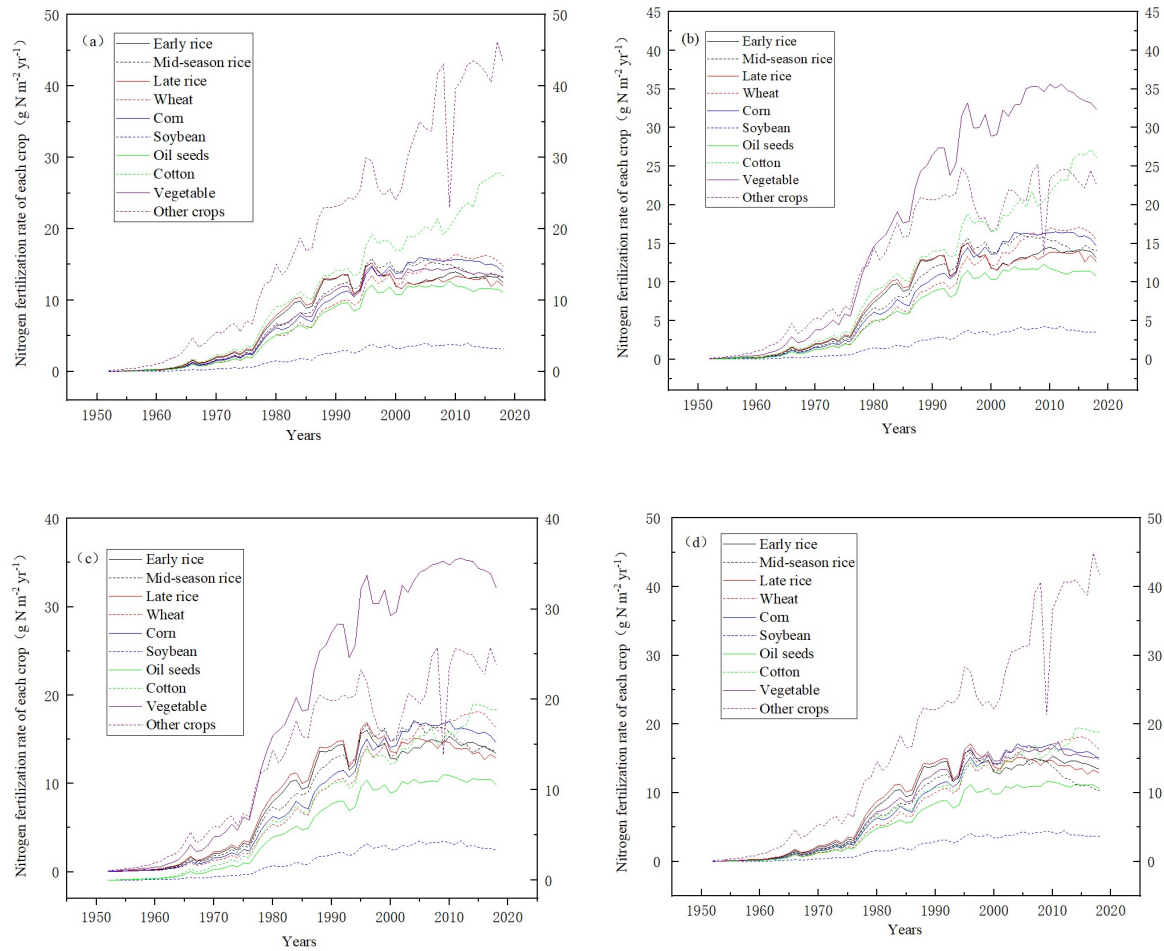

**Fig. S3** Supplementary information showing nitrogen fertilizer use rates in major crop types in China from 1952 to 2018 using data of national averages for gap-filling. (panel a: N fertilizer use rate of vegetable is the average of all other crops (except ‘Other crops’), and compound fertilizer contains 16% of N; panel b: N fertilizer rate of vegetable is the average of all other crops (except ‘Other crops’), and compound fertilizer contains 33% of N; panel c: N fertilizer use rates of vegetable is 3.3 times of the average rate of all other crops (except ‘Other crops’), and compound fertilizer contains 16% of N; panel b: N fertilizer use rate of vegetable is 3.3 times of the average rate of all other seeds (except ‘Other crops’), and compound fertilizer contains 33% of N; Unit:  $\text{g N m}^{-2} \text{yr}^{-1}$ )

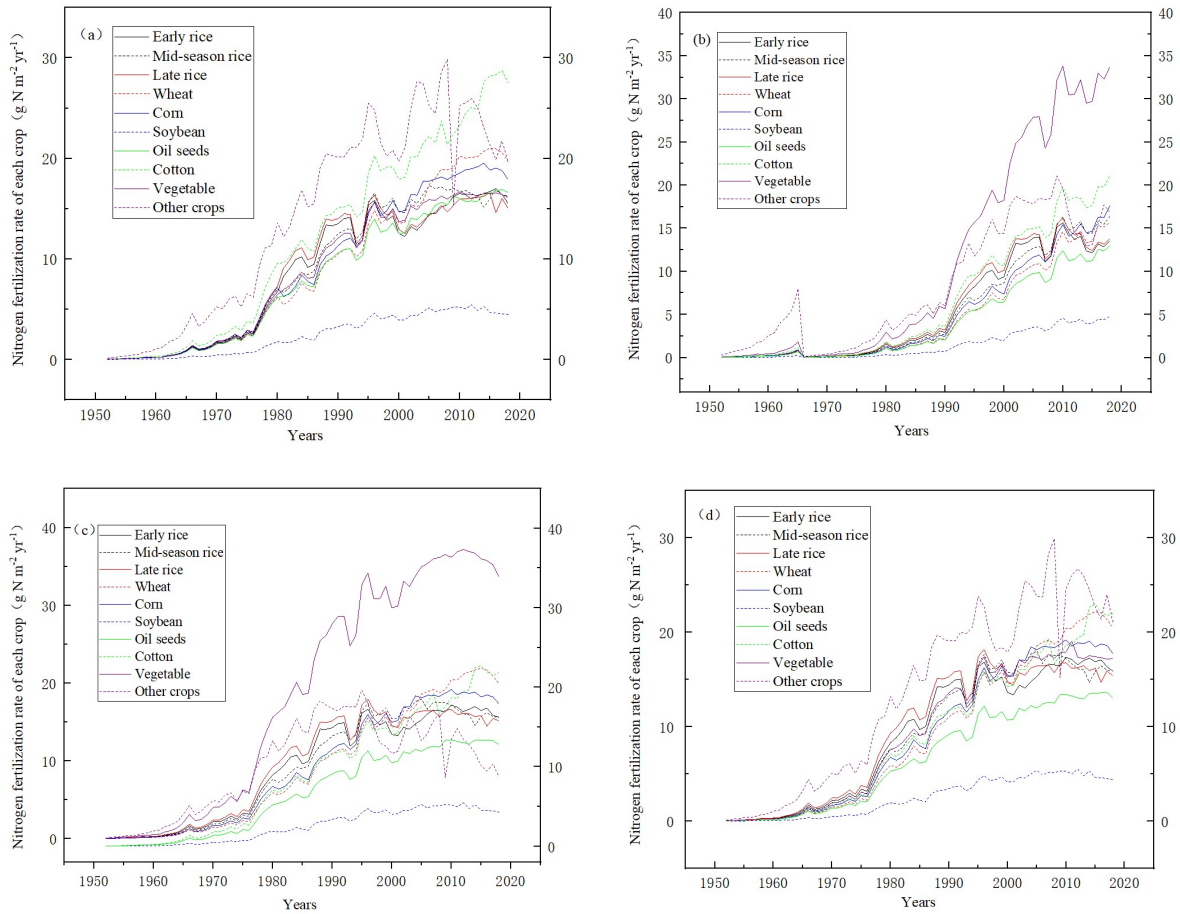

**Fig. S4** Supplementary information showing total nitrogen fertilizer input for each major crop types from 1952 to 2018 using data of nearby provinces for gap-filling. (panel a: N fertilizer use rates of vegetable is the average of all other crops (except ‘Other crops’), and compound fertilizer contains 16% of N; panel b: N fertilizer rate of vegetable is the average of all other crops (except ‘Other crops’), and compound fertilizer contains 33% of N; panel c: N fertilizer rate of vegetable is 3.3 times of the average rate of all other crops (except ‘Other crops’), and compound fertilizer contains 16% of N; panel d: N fertilizer use rates of vegetable is 3.3 times of the average rate of all other crops (except ‘Other crops’), and compound fertilizer contains 33% of N; Unit: Tg N yr<sup>-1</sup>)

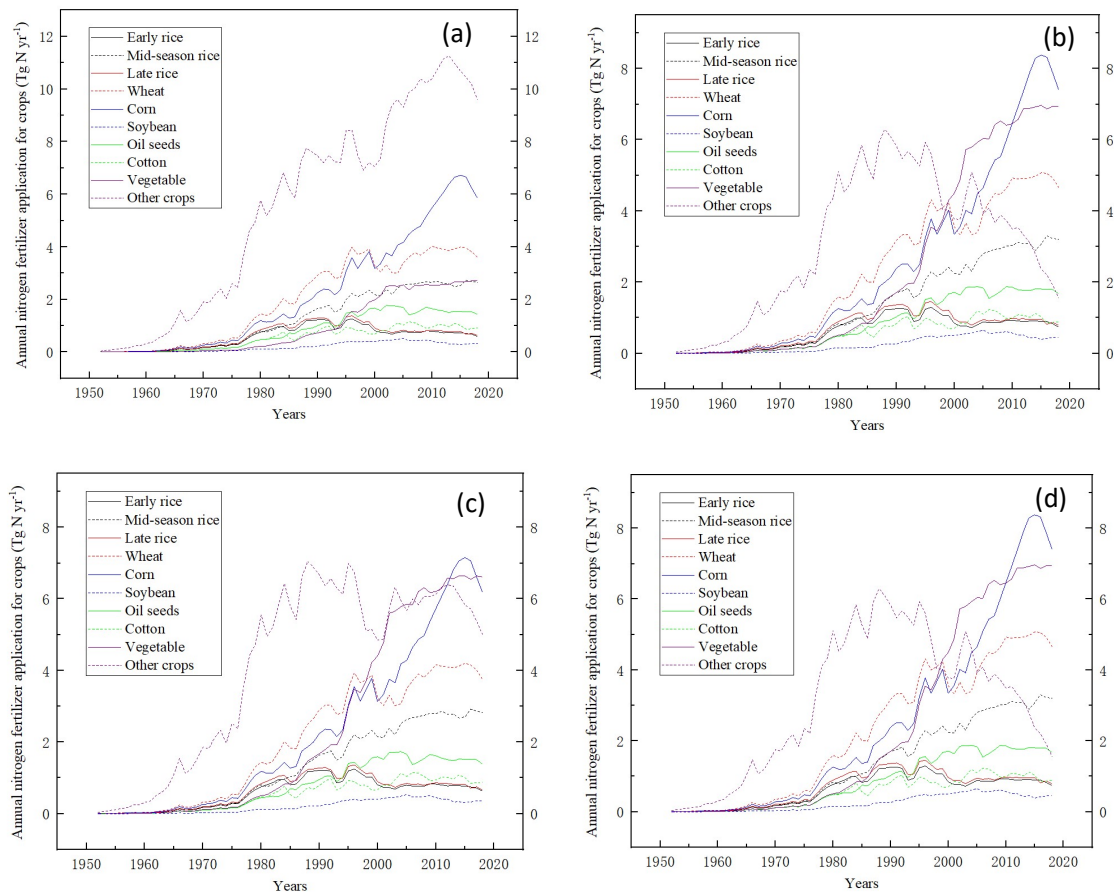

**Fig. S5** Supplementary information showing total nitrogen fertilizer input for each major crop types from 1952 to 2018 using data of national averages for gap-filling. (panel a: N fertilizer rate of vegetable is the average of all other crops (except ‘Other crops’), and compound fertilizer contains 16% of N; panel b: N fertilizer use rates of vegetable is the average of all other crops (except ‘Other crops’), and compound fertilizer contains 33% of N; panel c: N fertilizer use rates of vegetable is 3.3 times of the average rate of all other crops (except ‘Other crops’), and compound fertilizer contains 16% of N; panel b: N fertilizer use rates of vegetable is 3.3 times of the average rate of all other crops (except ‘Other crops’), and compound fertilizer contains 33% of N; Unit: Tg N yr<sup>-1</sup>)

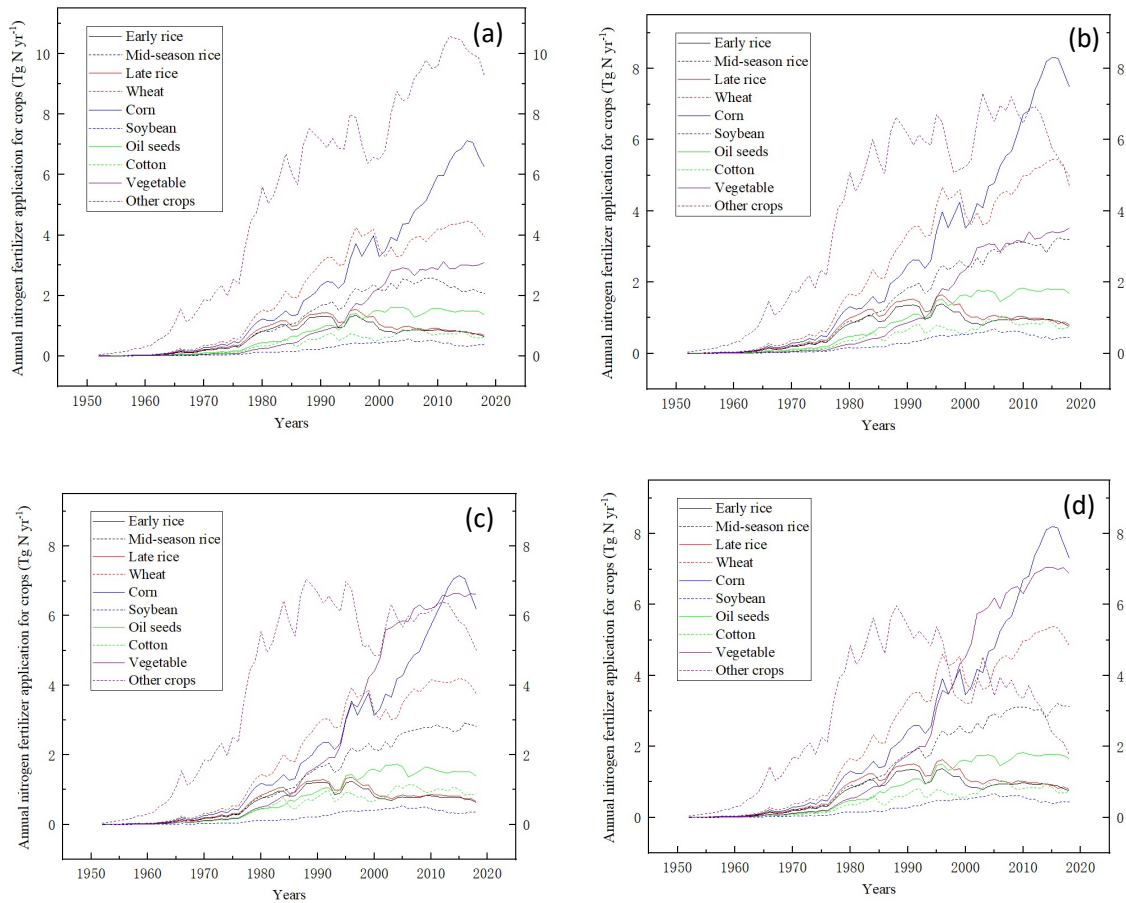

Supplement: Supplementary file 1 [file essd-14-5179-2022-supplement.pdf]
